# Supplementary material for: Consistency of the Neighbor-Net Algorithm
Source: Springer Nature journal article supplement (doi:10.1186/1748-7188-2-8), 2007-06-28
Supplement: 13015_2007_33_MOESM2_ESM.pdf [file 13015_2007_33_MOESM2_ESM.pdf]

## NEIGHBOR-NET( $X, d$ )

---

Input: A finite non-empty set  $X$  and a distance function  $d$  on  $X$   
Output: A circular split weight function  $\omega$

---

1.  $\mathfrak{C} = \{\{x\} \mid x \in X\}$  //initial set of clusters
2.  $\Theta = \text{FINDORDERING}(\mathfrak{C}, d)$
3.  $\omega = \text{ESTIMATESPLITWEIGHTS}(X, d, \Theta)$
4. **return**  $\omega$

## FINDORDERING( $\mathfrak{C}, d$ )

---

Input: A collection  $\mathfrak{C}$  of ordered clusters and a distance function  $d$   
Output: An ordering  $\Theta$  of the elements in  $\cup_{C \in \mathfrak{C}} C$

---

1.  $Y = \cup_{C \in \mathfrak{C}} C$
2.  $m = |\mathfrak{C}|$
3.  $n = |Y|$
4. **if**  $n \leq 3$  //base case
5.     **return** an ordering  $\Theta$  of  $Y$  that is compatible with  $\mathfrak{C}$ .
6. **else if** there exists  $C \in \mathfrak{C}$  with  $k = |C| \geq 3$  //reduction case
7.     Select  $x = c_1, y = c_2$  and  $z = c_3$  from  $C$  with  $\Theta_C = c_1, \dots, c_k$ .
8.     Create two new elements  $u, v$  not contained in  $Y$ .
9.      $C' = (C \setminus \{x, y, z\}) \cup \{u, v\}$
10.      $\Theta_{C'} = u, v, c_4, \dots, c_k$
11.      $\mathfrak{C}' = (\mathfrak{C} \setminus \{C\}) \cup \{C'\}$
12.     Compute distance function  $d'$  on  $Y' = \cup_{C \in \mathfrak{C}'} C$  according to (1).
13.      $\Theta' = \text{FINDORDERING}(\mathfrak{C}', d')$
14.     Compute an ordering  $\Theta$  of  $Y$  according to (2).
15.     **return**  $\Theta$
16. **else** //selection case
17.     Select two clusters  $C_1, C_2 \in \mathfrak{C}$  that minimize (3).
18.      $C' = C_1 \cup C_2$
19.     Compute ordering  $\Theta_{C'}$  using (4).
20.      $\mathfrak{C}' = (\mathfrak{C} \setminus \{C_1, C_2\}) \cup \{C'\}$
21.      $\Theta = \text{FINDORDERING}(\mathfrak{C}', d)$
22.     **return**  $\Theta$
